# Supplementary material for: An integrated micro-electro-fluidic and protein arraying system for parallel analysis of cell responses to controlled microenvironments
Source: Royal Society of Chemistry journal article supplement (doi:10.1039/c0ib00017e), 2010-01-01
Supplement: c0ib00017e.pdf [file c0ib00017e.pdf]

Supplementary Information

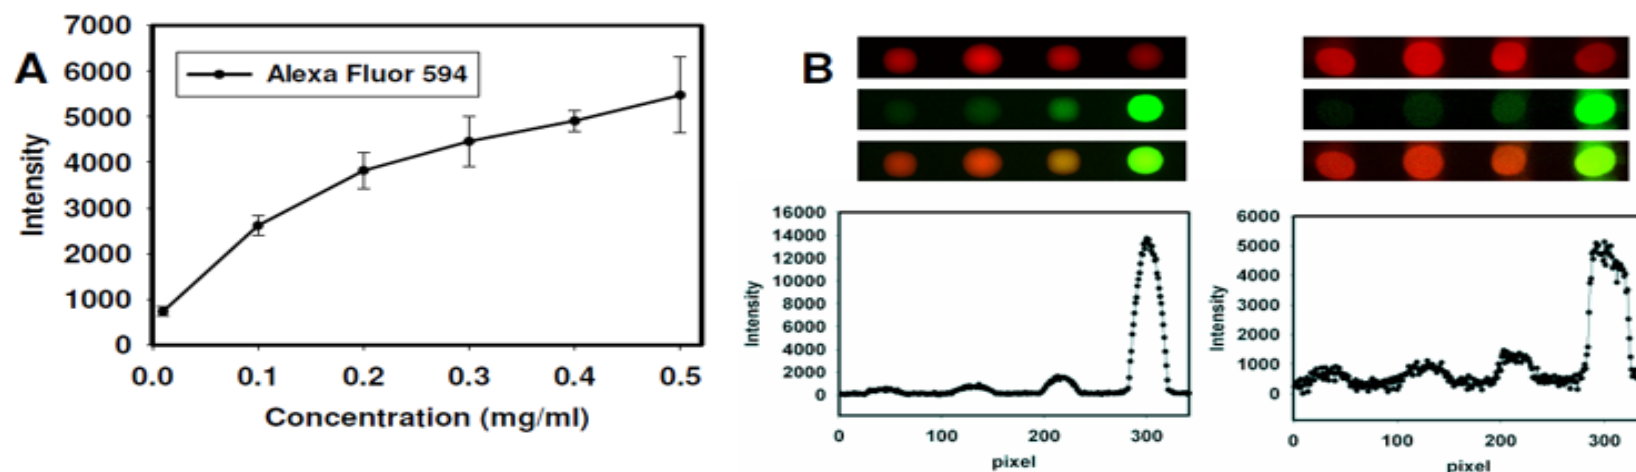

Supplementary Figure 1. Properties of the protein deposition onto the cell culture substratum. A: A range of concentrations of Alexa 594-conjugated secondary antibody were printed on NHS-derivatized glass slide. After being in contact with the surface for several hours and a wash, the intensity of fluorescence, which corresponds to protein concentration level on spots, was measured by a GenePix 4000B ; B: Printing of four different concentration of Alexa 488-conjugated secondary antibody (green): at 0.001; 0.01; 0.1; 1 mg/ml along with the same Alexa 594-conjugated secondary antibody (red) at the constant concentration of 1 mg/ml was performed to test the competition for available NHS-derivatized surface. The strips indicate the fluorescence of Alexa 488 only (upper), Alexa 594 only (middle) and both dyes (lower), prior (left panels) and following (right panels) a wash. The results for Alexa 488 fluorescence intensity are quantified in the graphs.

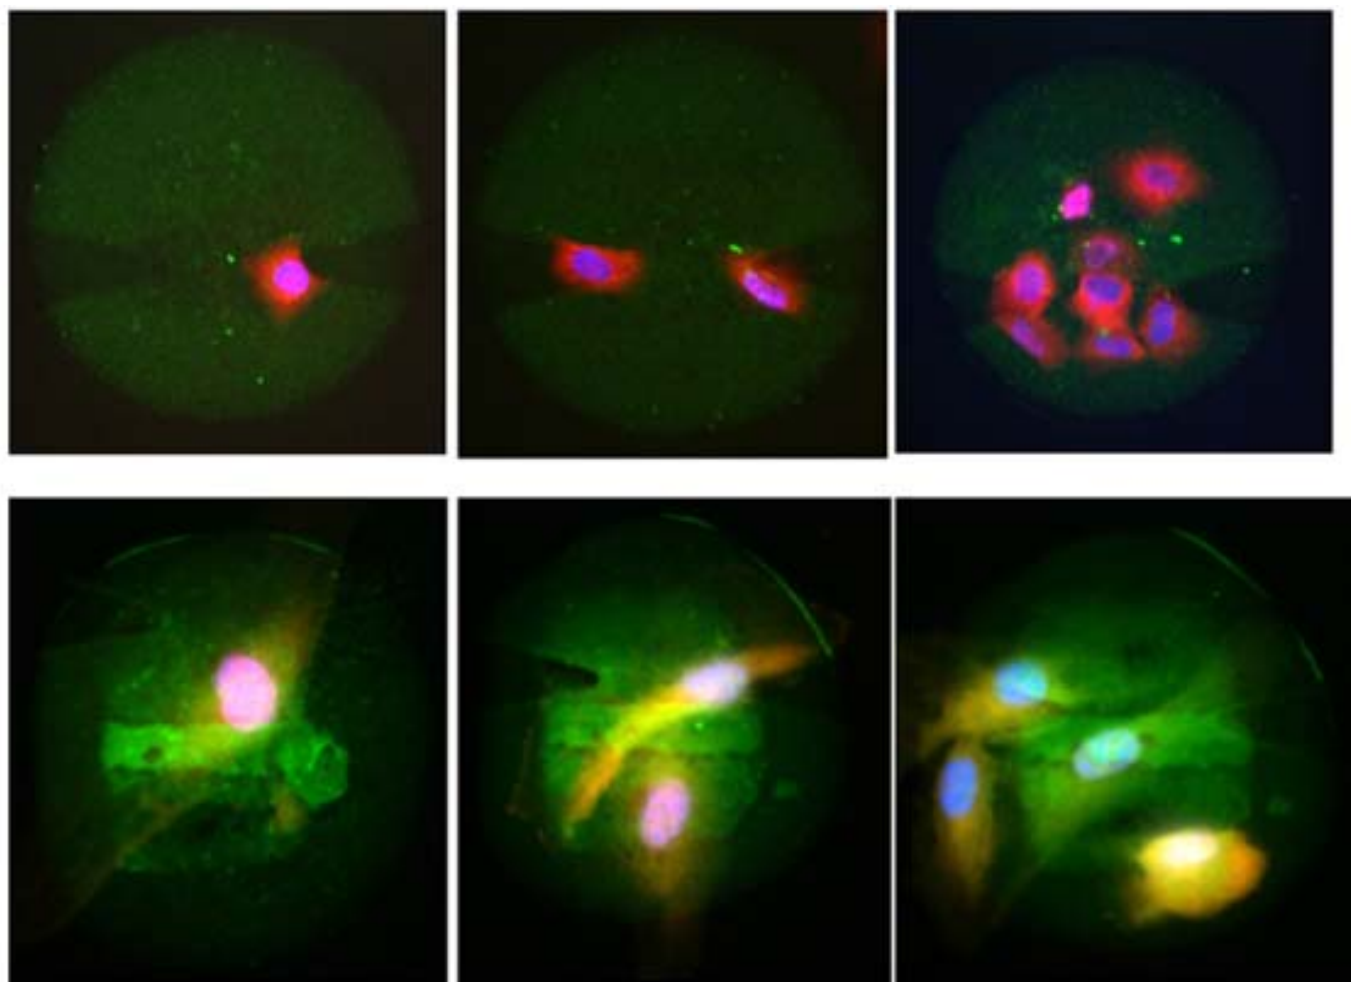

Supplementary Figure 2. Different cell types tested using the system combining dielectrophoresis-assisted microfluidics with protein micro-arraying for cell signaling studies. Top panel: A549 Cells on printed TNF $\alpha$  with conjugated collagen 488; bottom panel: iHUVCEs printed TNF $\alpha$  with conjugated collagen 488. Cells were stained within the chip to indicate the location of the nucleus (stained with DAPI, blue) and anti-p65 antibody (red).

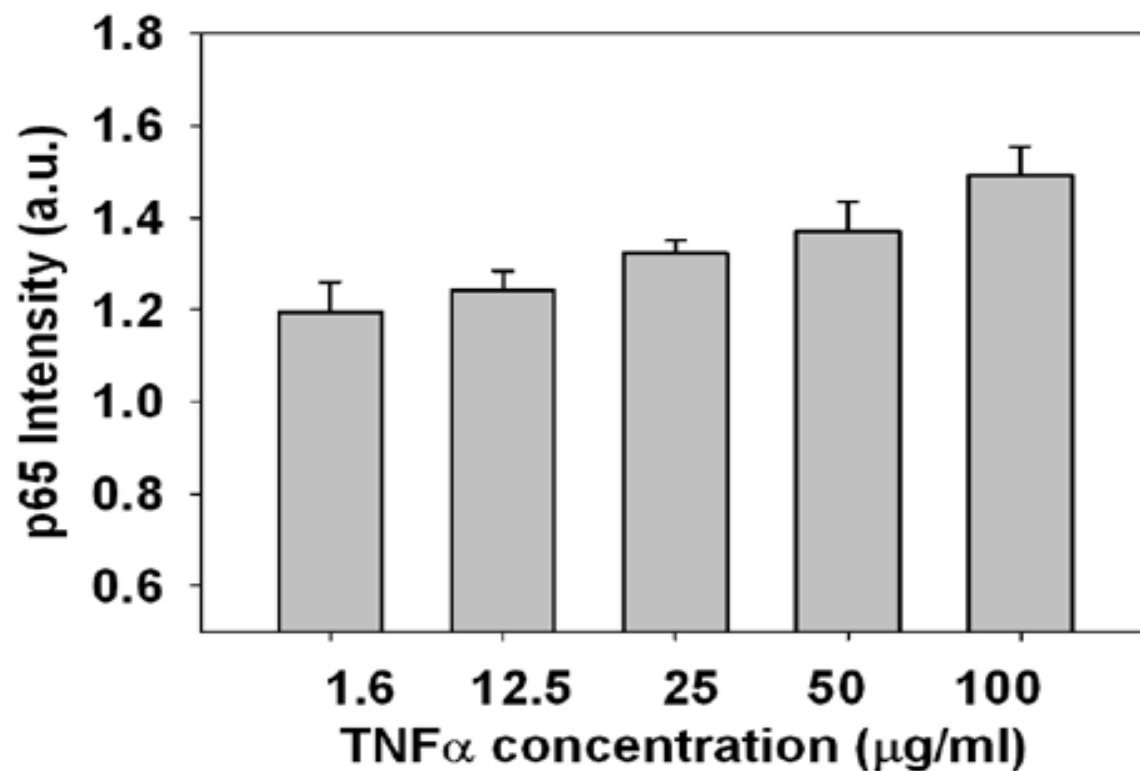

Supplementary Figure 3. The dose response of p65 nuclear translocation in iHUVCEC cells stimulated by immobilized TNF $\alpha$  at indicated coating concentrations. The fluorescence intensity values represent in arbitrary units the amount of NF- $\kappa$ B in cell nuclei measured by immunostaining using an anti-p65 antibody. Error bars represent the standard error of the mean. Immunostaining was performed after cells seeded on immobilized TNF $\alpha$  for 3 hours.
